# Supplementary material for: Four Cu(ii) complexes based on antitumor chelators: synthesis, structure, DNA binding/damage, HSA interaction and enhanced cytotoxicity
Source: Royal Society of Chemistry journal article supplement (doi:10.1039/c6dt00451b), 2016-01-01
Supplement: c6dt00451b1.pdf [file c6dt00451b1.pdf]

## Supporting Information

### Four Cu(II) complexes based on antitumor chelators: synthesis, structure, DNA binding/damage, HSA interaction and enhanced cytotoxicity

Ya-Hong Liu,<sup>1</sup> Ang Li,<sup>1</sup> Jia Shao, Xue-Qing Song, Cheng-Zhi Xie, Wei-Guo Bao, Jing-Yuan Xu\*

*Tianjin Key Laboratory on Technologies Enabling Development of Clinical Therapeutics and Diagnostics (Theranostics), School of Pharmacy, Tianjin Medical University, Tianjin 300070, P. R. China.*

\* E-mail: xujingyuan@tmu.edu.cn

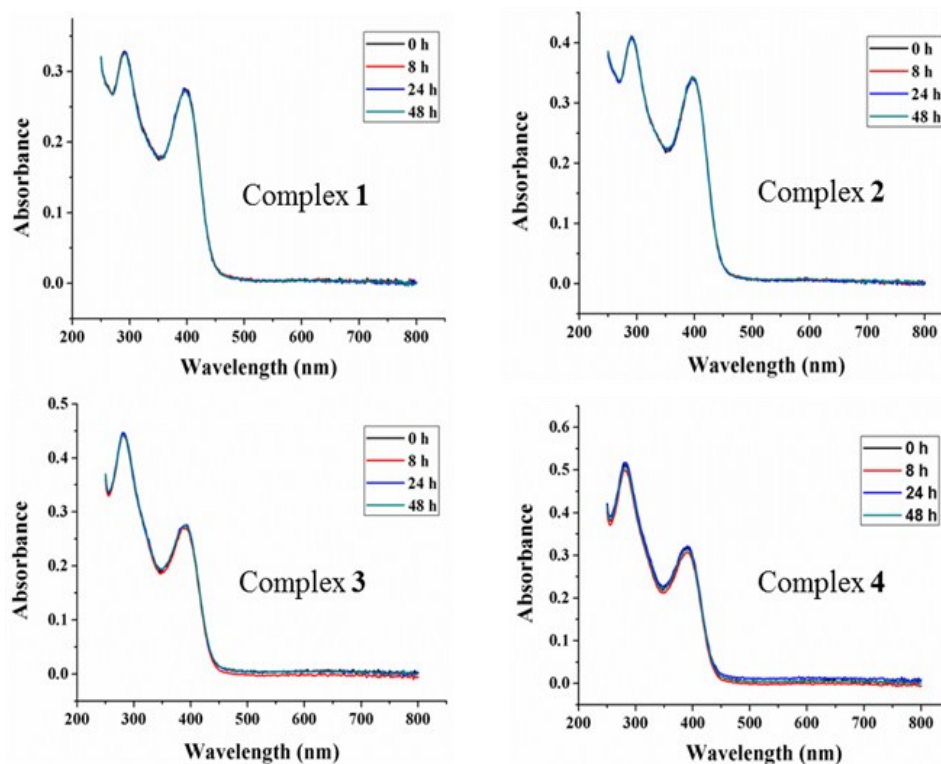

**Fig S1.** The stability studies of complexes 1–4 in PBS for 6, 8, 24, and 48 h at 37°C.
